# Supplementary material for: Relationship between the extent of resection and the survival of patients with low-grade gliomas: a systematic review and meta-analysis
Source: Springer Nature journal article supplement (doi:10.1186/s12885-017-3909-x), 2018-01-06

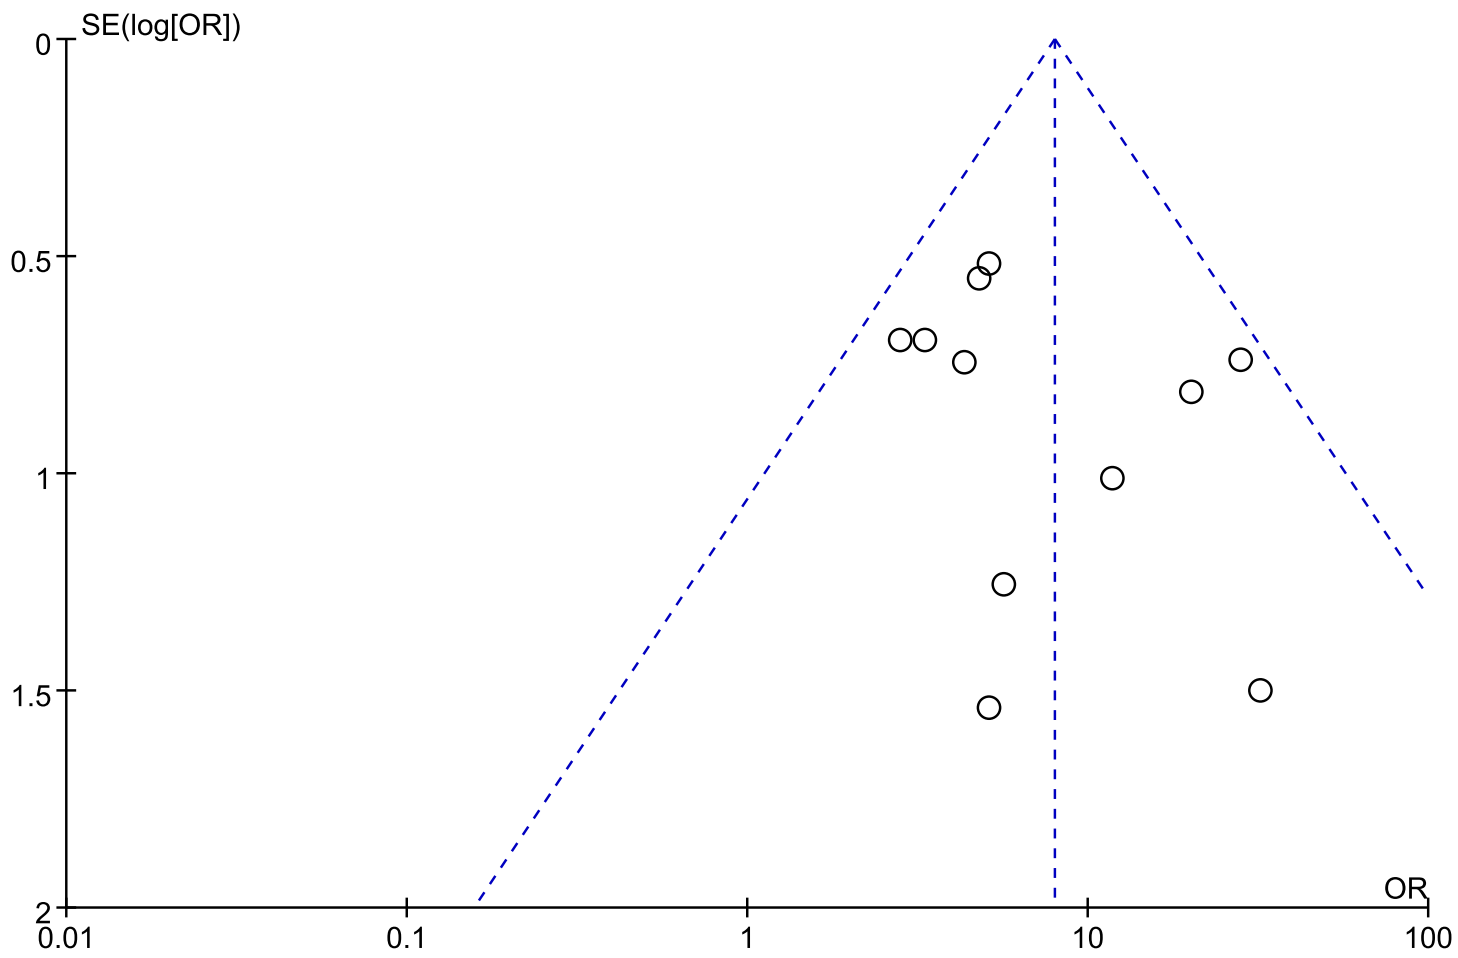

Supplement: MOESM5 [file 15347926]
